# Supplementary material for: Revisiting Isothermal Effectiveness Factor Equations for Reversible Reactions
Source: MDPI journal article supplement (doi:10.3390/catal13050889), 2023-05-15
Supplement: s1 [file s1]

# SUPPLEMENTARY MATERIAL

## Revisiting isothermal effectiveness factor equations for reversible reactions

William Rios<sup>1</sup>, Bruno Antunes<sup>1</sup>, Alírio E. Rodrigues<sup>2</sup>, Inês Portugal<sup>1</sup> and Carlos M. Silva<sup>1\*</sup>

<sup>1</sup> CICECO - Aveiro Institute of Materials, Department of Chemistry, University of Aveiro, Campus  
Universitário de Santiago, 3810-193 Aveiro, Portugal

<sup>2</sup> Associate Laboratory LSRE - Laboratory of Separation and Reaction Engineering, Department of Chemical Engineering, Faculty of Engineering, University of Porto, Rua Dr Roberto Frias s/n, Porto, 4200-465, Portugal

### SM1. Calculating effective diffusivities in porous catalysts

In this work, effective diffusivities were calculated using two different approaches to evaluate their impact on the analytical effectiveness factor. The first approach is based on the Rios, et al., [1] model and takes into consideration mixture non-idealities using activity coefficients, whereas the second assumes mixtures are ideal and is based on Bird, et al., [2] equations. The equations associated with each model are briefly summarized in this section.

#### SM1.1. Non-ideal effective diffusivities model equations (Rios, et al., [1])

Given a mixture with  $n$  components, the effective diffusivities in solution,  $D_{ef,i}^{mix}$ , of the first  $n - 1$  species are given by:

$$\frac{1}{D_{ef,i}^{mix}} = \sum_{j=1}^{n-1} D_{ij}^{inv} \frac{\vec{J}_j}{\vec{J}_i} \quad (SM1)$$

where  $\vec{J}_j$  is the molar diffusion flux vector of component  $j$  and  $D_{ij}^{inv}$  represents the  $ij$  entry of the inverse of matrix  $[D]$ , defined as the product of two matrices:

$$[D] = [B]^{-1}[\Gamma] \quad (SM2a)$$

$$B_{ii} = \frac{x_i}{\mathfrak{D}_{in}} + \sum_{\substack{j=1 \\ j \neq i}}^n \frac{x_j}{\mathfrak{D}_{ij}} \quad (SM2b)$$

$$B_{ij} = -x_i \left( \frac{1}{\mathfrak{D}_{ij}} - \frac{1}{\mathfrak{D}_{in}} \right) \quad (SM2c)$$

$$\Gamma_{ij} = \delta_{ij} + x_i \left. \frac{\partial \ln \gamma_i}{\partial x_j} \right|_{P,T,x_k[k=1,2,\dots,n-1,k \neq j]} \quad (\text{SM2d})$$

$$\delta_{ij} = \frac{\partial x_i}{\partial x_j} = \begin{cases} \delta_{ij} = 0, & i \neq j \\ \delta_{ij} = 1, & i = j \end{cases} \quad (\text{SM2e})$$

where  $B_{ii}$  and  $B_{ij}$  are the diagonal and off-diagonal elements of  $[B]$ , respectively,  $\Gamma_{ij}$  is the  $ij$  element of  $[\Gamma]$ ,  $\gamma_i$  is the activity coefficient of  $i$ ,  $x_i$  is the liquid phase mole fraction of  $i$ , and  $\mathfrak{D}_{ij}$  is a Maxwell–Stefan diffusion coefficient.

The effective diffusivity of the  $n^{th}$  component is calculated with:

$$\frac{1}{D_{\text{ef},n}^{\text{mix}}} = - \sum_{j=1}^{n-1} \frac{1}{D_{\text{ef},j}} \frac{\vec{J}_j}{\vec{J}_n} \quad (\text{SM3})$$

### SM1.2. Ideal effective diffusivities model equations

For ideal solutions, Bird, et al., [2] proposed the following equations for the effective diffusivities of a species  $i$  in a mixture of  $n$  components:

$$D_{\text{ef},i}^{\text{Mix,Ideal}} = \frac{\vec{N}_i - \vec{N}_T x_i}{\vec{N}_i \sum_{j=1, j \neq i}^n \frac{x_j}{\mathfrak{D}_{ij}} - x_i \sum_{j=1, j \neq i}^n \frac{\vec{N}_j}{\mathfrak{D}_{ij}}} \quad (\text{SM4})$$

where  $\vec{N}_i$  is the molar flux of  $i$  and  $\vec{N}_T$  is the total molar flux. This expression can be derived from the equations presented in SM1.1. by setting  $[\Gamma] = [I]$  (identity matrix) and manipulating resulting expressions.

### SM1.3. Case studies specifics

Given the relationship between  $\vec{N}_i$  and  $\vec{J}_i$ , i.e.,  $\vec{N}_i = \vec{J}_i + x_i \vec{N}_T$ , the required ratios  $\vec{J}_j / \vec{J}_i$  to calculate effective diffusivities can be computed from the reaction stoichiometry.

- Case 1—esterification of ethanol with acetic acid ( $A + B \rightleftharpoons C + D$ ): since the sum of stoichiometric coefficients is zero,  $\vec{N}_T = 0$ , which yields  $\vec{N}_i = \vec{J}_i$ . Then, the ratios  $\vec{J}_j / \vec{J}_i$  are independent of the mixture composition and are given by:

$$\frac{\vec{J}_j}{\vec{J}_i} = \begin{cases} 1, & j \text{ and } i \text{ are both products or reactants} \\ -1, & \text{otherwise} \end{cases} \quad (\text{SM5})$$

- Case 2—acetal synthesis ( $2A + B \rightleftharpoons C + D$ ): using the reaction stoichiometry, it is possible to express the molar flux of each component in terms of the molar flux of a reference species  $A$ . Knowing that  $N_B = 0.5 N_A$ ,  $N_C = -0.5 N_A$  and  $N_D = -0.5 N_A$  yields  $N_T = 0.5 N_A$ , thus:

$$J_A = N_A(1 - 0.5x_A) \quad (\text{SM6a})$$

$$J_B = \frac{1}{2} N_A(1 - x_B) \quad (\text{SM6b})$$

$$J_C = -\frac{1}{2} N_A(1 + x_C) \quad (\text{SM6c})$$

$$J_D = -\frac{1}{2} N_A(1 + x_D) \quad (\text{SM6d})$$

Then, the following matrix of molar diffusion fluxes can be written:

$$\begin{bmatrix} \frac{J_A}{J_A} & \frac{J_B}{J_A} & \frac{J_C}{J_A} & \frac{J_D}{J_A} \\ \frac{J_A}{J_B} & \frac{J_B}{J_B} & \frac{J_C}{J_B} & \frac{J_D}{J_B} \\ \frac{J_A}{J_C} & \frac{J_B}{J_C} & \frac{J_C}{J_C} & \frac{J_D}{J_C} \\ \frac{J_A}{J_D} & \frac{J_B}{J_D} & \frac{J_C}{J_D} & \frac{J_D}{J_D} \end{bmatrix} = \begin{bmatrix} 1 & \frac{1}{2} \cdot \frac{1 - x_B}{1 - 0.5x_A} & -\frac{1}{2} \cdot \frac{1 + x_C}{1 - 0.5x_A} & -\frac{1}{2} \cdot \frac{1 + x_D}{1 - 0.5x_A} \\ 2 \cdot \frac{1 - 0.5x_A}{1 - x_B} & 1 & -\frac{1 + x_C}{1 - x_B} & -\frac{1 + x_D}{1 - x_B} \\ -2 \cdot \frac{1 - 0.5x_A}{1 + x_C} & -\frac{1 - x_B}{1 + x_C} & 1 & \frac{1 + x_D}{1 + x_C} \\ -2 \cdot \frac{1 - 0.5x_A}{1 + x_D} & -\frac{1 - x_B}{1 + x_D} & \frac{1 + x_C}{1 + x_D} & 1 \end{bmatrix}$$

For binary mixtures at infinite dilution, the Maxwell–Stefan diffusion coefficient is equal to the binary diffusion coefficient,  $\mathfrak{D}_{ij}^\infty = D_{ij}^\infty$ . By estimating  $D_{ij}^\infty$  for each  $ij$  pair, the  $\mathfrak{D}_{ij}$  for the desired composition is obtained with the following mixing rule:

$$\mathfrak{D}_{ij} = (\mathfrak{D}_{ij}^\infty)^{(1-x_i+x_j)/2} \times (\mathfrak{D}_{ji}^\infty)^{(1-x_j+x_i)/2} \quad (\text{SM7})$$

In this work, the Wilke–Chang equation [3] was employed to calculate  $D_{ij}^\infty$ .

## SM2. Calculating equilibrium concentrations

The thermodynamic equilibrium constant,  $K$ , is given by:

$$K = \prod_j a_{j\text{eq}}^{\nu_j} = \left( \prod_j x_{j\text{eq}}^{\nu_j} \right) \times \left( \prod_j \gamma_{j\text{eq}}^{\nu_j} \right) \equiv K_x K_\gamma \quad (\text{SM8})$$

where  $\nu_j$  is the stoichiometric and  $a_j$  the activity of component  $j$ , which for a liquid phase reaction is defined as  $a_j = \gamma_j x_j$ , in which  $x_j$  and  $\gamma_j$  represent the mole fraction and the activity coefficient of component  $j$ , respectively, and subscript “eq” denotes equilibrium.

The value of  $K$  at the working temperature is obtained from thermodynamic data using the Van’t Hoff equation:

$$\frac{d \ln K}{dT} = \frac{\Delta H_R^\circ + \sum_j \nu_j C_{p_j} (T - 298.15)}{R_g T^2} \quad (\text{SM9})$$

with  $\ln K = -\Delta G_R^\circ / (R_g T_{\text{ref}})$  at  $T_{\text{ref}} = 298.15$ , where  $R_g$  is the universal gas constant,  $C_{p_j}$  is the constant pressure heat capacity of component  $j$ , and  $\Delta H_R^\circ$  and  $\Delta G_R^\circ$  are the standard enthalpy and the Gibbs free energy of reaction, respectively. From equation (SM8), the value of  $K$  depends only on temperature, but  $K_\gamma$  is composition-dependent, so the calculation of  $K_x$  requires an iterative procedure, described below:

1. In the first iteration, provide an estimate of  $K_\gamma$ , such as  $K_\gamma = 1$ ;
2. Calculate  $K_x = K/K_\gamma$ ;
3. Calculate the equilibrium conversion,  $X_{\text{eq}}$ , by solving  $K_x = \prod_j x_{j_{\text{eq}}}^{\nu_j}$ , with:

$$x_{j_{\text{eq}}} = x_{j_{\text{in}}} + \nu_j x_{A_{\text{in}}} X_{\text{eq}} \quad (\text{SM10})$$

in which  $x_{A_{\text{in}}}$  is the initial mole fraction of component  $A$  (at  $t = 0$ ).

For the type I reaction ( $A + B \rightleftharpoons C + D$ ) with an equimolar feed of reactants, this step is simplified to:

$$X_{\text{eq}} = \frac{\sqrt{K_x}}{1 + \sqrt{K_x}} \quad (\text{SM11})$$

4. Calculate the equilibrium mole fractions using equation (SM10);
5. Compute the activity coefficients of each component,  $\gamma_{j_{\text{eq}}}$ , at the calculated composition, and then calculate  $K_\gamma = \prod_j \gamma_{j_{\text{eq}}}^{\nu_j}$  using an appropriate activity coefficient model (e.g., the UNIFAC model [4]);
6. Using the previously calculated  $K_\gamma$ , repeat steps 2—5 until the algorithm converges, i.e., the variation in  $X_{\text{eq}}$  between two consecutive iterations is smaller than a specified tolerance:

$$\Delta X_{\text{eq}} < \text{tolerance} \quad (\text{SM12})$$

7. Once the method has converged,  $X_{\text{eq}}$  is used to calculate  $C_{A_{\text{eq}}}$  directly with:

$$C_{A_{\text{eq}}} = C_{A_{\text{in}}} (1 - X_{\text{eq}}) \quad (\text{SM13})$$

which also enables the determination of  $K_x$  using the equilibrium mole fractions.

### SM3. Wet Amberlyst-15 resin porosity calculation

In the first case study regarding the esterification of ethanol with acetic acid, the Amberlyst-15 catalyst particles were not dried before being used for the reaction. Consequently, the porosity of the wet resin might differ from that of the dry resin, which is typically the value reported in the literature. To account for this, the porosity of wet Amberlyst-15 was estimated with its water-swollen properties given by Badia *et al.* [5], who obtained them using the Inverse Steric Exclusion Chromatography (ISEC) technique. This technique is a variation on the size exclusion chromatography capable of providing information on the microporous structure of a swollen polymer [6]. The porosity is then given by:

$$\varepsilon = 1 - \frac{1}{\rho_{sk}} \times \frac{1}{V_{sp} + V_{pore}} \quad (\text{SM14})$$

where  $V_{sp} = 0.765 \text{ cm}^3/\text{g}$  is the specific volume of the swollen polymer,  $V_{pore} = 0.616 \text{ cm}^3/\text{g}$  is the volume of the meso-macropores in water-swollen state,  $\rho_{sk} = 1.416 \text{ g/cm}^3$  is the skeletal density of the dry resin. Replacing these values (provided by Badia *et al.* [5]) in equation SM14 yields  $\varepsilon = 0.489$ .

## References

1. Rios, W.Q.; Antunes, B.; Rodrigues, A.E.; Portugal, I.; Silva, C.M. Accurate Effective Diffusivities in Multicomponent Systems. *Processes* **2022**, *10*, 2042, doi:10.3390/pr10102042.
2. Bird, R.B.; Stewart, W.E.; Lightfoot, E.N. Diffusivity and the Mechanisms of Mass Transport. In *Transport phenomena*; J. Wiley: New York, 2002 ISBN 978-0-471-41077-5.
3. Poling, B.E.; Prausnitz, J.M.; O'Connell, J.P. *The Properties of Gases and Liquids*; 5th ed.; McGraw-Hill: New York, 2001; ISBN 978-0-07-011682-5.
4. Elliott, J.R.; Lira, C.T. *Introductory Chemical Engineering Thermodynamics*; 2nd edition.; Prentice Hall: Upper Saddle River, NJ, 2012; ISBN 978-0-13-606854-9.
5. Badia, J.H.; Fité, C.; Bringué, R.; Ramírez, E.; Iborra, M. Relevant Properties for Catalytic Activity of Sulfonic Ion-Exchange Resins in Etherification of Isobutene with Linear Primary Alcohols. *J. Ind. Eng. Chem.* **2016**, *42*, 36–45, doi:10.1016/j.jiec.2016.07.025.
6. Biffis, A.; Corain, B.; Zecca, M.; Corvaja, C.; Jerabek, K. On the Macromolecular Structure and Molecular Accessibility of Swollen Microporous Resins: A Combined ESR-ISEC Approach. *J. Am. Chem. Soc.* **1995**, *117*, 1603–1606, doi:10.1021/ja00110a015.

## Nomenclature

|                     |                                                                       |
|---------------------|-----------------------------------------------------------------------|
| $a_j$               | activity of component $j$                                             |
| $C_j$               | concentration of component $j$ , mol/dm <sup>3</sup>                  |
| $Cp_j$              | constant pressure specific heat capacity of component $j$ , J/(mol K) |
| $D_{ij}$            | diffusion coefficient, dm <sup>2</sup> /min                           |
| $\mathfrak{D}_{ij}$ | Maxwell-Stefan diffusion coefficient, dm <sup>2</sup> /min            |
| $G$                 | Gibbs free energy, J/mol                                              |
| $H$                 | enthalpy, J/mol                                                       |
| $J_j$               | molar diffusion flux, mol/(dm <sup>2</sup> min)                       |
| $K$                 | thermodynamic equilibrium constant                                    |
| $K_x$               | defined in equation (SM8)                                             |
| $K_\gamma$          | defined in equation (SM8)                                             |
| $N_j$               | molar flux, mol/(dm <sup>2</sup> min)                                 |

|          |                                               |
|----------|-----------------------------------------------|
| $R_g$    | universal gas constant, J/(mol K)             |
| $T$      | temperature, K                                |
| $t$      | time, min                                     |
| $V_{sp}$ | volume of swollen polymer, cm <sup>3</sup> /g |
| $V_p$    | volume of pores, cm <sup>3</sup> /g           |
| $X_{eq}$ | equilibrium conversion                        |
| $x_j$    | liquid phase mole fraction of component $j$   |

## Greek letters

|             |                                             |
|-------------|---------------------------------------------|
| $\gamma$    | activity coefficient                        |
| $\Delta$    | variation of a thermodynamic property       |
| $\nu_j$     | stoichiometric coefficient of component $j$ |
| $\rho_{sk}$ | skeletal density, g/cm <sup>3</sup>         |

## Subscripts

|     |             |
|-----|-------------|
| ef  | effective   |
| eq  | equilibrium |
| in  | initial     |
| $R$ | reaction    |
| Ref | reference   |

## Superscripts

|          |                                       |
|----------|---------------------------------------|
| inv      | inverse                               |
| mix      | mixture                               |
| $\infty$ | infinite dilution                     |
| $^\circ$ | standard conditions (1 bar, 298.15 K) |
